# Supplementary material for: A laser-induced graphene-based electrochemical immunosensor for nucleic acid methylation detection
Source: Royal Society of Chemistry journal article supplement (doi:10.1039/d3an01628e), 2023-11-21
Supplement: d3an01628e1.pdf [file d3an01628e1.pdf]

## Supporting Information

### **Laser-induced graphene-based electrochemical immunosensor for nucleic acid methylation detection**

Jingyi Guo <sup>a</sup>, Mei Zhao <sup>a</sup>, Chen Chen <sup>a</sup>, Fang Wang <sup>\*a</sup> and Zilin Chen <sup>a</sup>

<sup>a</sup> School of Pharmaceutical Sciences, Key Laboratory of Combinatorial Biosynthesis and Drug Discovery (MOE),  
Wuhan University, Wuhan, 430071, China. Email: fwang@whu.edu.cn

Corresponding author:

Prof. Fang Wang

Tel: 86-27-68759829, fax: 86-27-68759850.

E-mail address: fwang@whu.edu.cn

Contents :

1. IR characterization of LIG electrode.
2. Different concentration of HT.
3. Table of electrochemical strategies for m6A-RNA and 5mC-ssDNA detection.

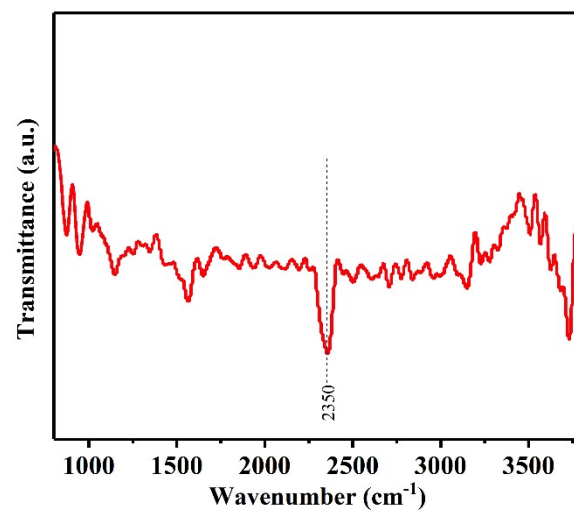

Fig. S1 FTIR spectrum of LIG.

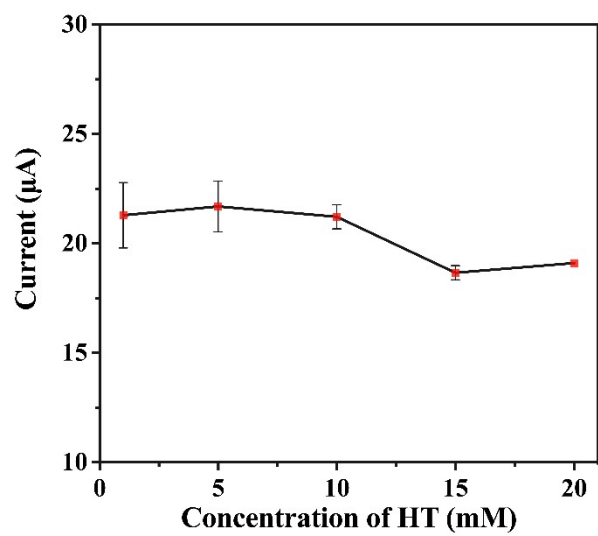

Fig. S2 Different concentration of HT.

**Table S1.** Electrochemical strategies for m6A-RNA and 5mC-ssDNA detection.

| Electrode                                 | Target    | Signal amplification strategy                                                                                                                 | Linear range | LOD     | Refs      |
|-------------------------------------------|-----------|-----------------------------------------------------------------------------------------------------------------------------------------------|--------------|---------|-----------|
| AuNPs/Au                                  | 5mC-DNA   | HRP-IgG for catalyzing HQ/H <sub>2</sub> O <sub>2</sub> redox system                                                                          | 1 fM–10 nM   | 0.84 fM | 1         |
| GO-Fe <sub>3</sub> O <sub>4</sub> -CD/GCE | 5mC-DNA   | ALP-Avidin-PAMAM                                                                                                                              | 0.01–50 nM   | 3.2 pM  | 2         |
| MB-SPCE                                   | 5mC-DNA   | HRP for catalyzing HQ/H <sub>2</sub> O <sub>2</sub> redox system                                                                              | 4.0–250 pM   | 1.2 pM  | 3         |
| Microfluidic chip                         | 5mC-DNA   | MBD1 conjugated with SiNP causing signal current decrease                                                                                     | 50 pM–500 nM | 11.8 pM | 4         |
| Au electrode                              | m6A-RNA   | Immune competition of m6A-RNA and m6A-DNA with RNase helped signal amplification                                                              | 0.05–200 nM  | 16 pM   | 5         |
| AuNPs/GCE                                 | m6A-RNA   | Decreased signal of [Fe(CN) <sub>6</sub> ] <sup>3-</sup> / [Fe(CN) <sub>6</sub> ] <sup>4-</sup> caused by antibody recognizing methylated RNA | 0.01-10 nM   | 2.57 pM | 6         |
| Au electrode                              | m6A-RNA   | Competition of m6A-RNA and m6A-DNA-PtCo and PtCo catalyzing H <sub>2</sub> O <sub>2</sub> reduction                                           | 0.005-100nM  | 2.1 pM  | 7         |
| AuNPs/Au                                  | m6A-RNA   | RNA ligase helping hybridization and HRP-IgG-AuNPs catalyzing H <sub>2</sub> O <sub>2</sub> -HQ redox system                                  | 10 fM-10 nM  | 3.35 fM | 8         |
| AuNPs/LIG                                 | 5mC-ssDNA | Biotinylated-antibody binding SA-HRP and catalyzing H <sub>2</sub> O <sub>2</sub> -HQ redox system                                            | 0.01–10 nM   | 9.53 pM | This work |
| AuNPs/LIG                                 | m6A-RNA   |                                                                                                                                               | 0.01–10 nM   | 2.81 pM | This work |

## Reference

1. J. Huang, S. Zhang, F. Mo, S. S. Su, X. Chen, Y. Li, L. C. Fang, H. Huang, J. Deng, H. M. Liu, X. L. Yang and J. S. Zheng, *Biosens Bioelectron*, 2019, 127, 155-160.
2. Y. L. Zhou, W. J. Jiang, H. W. Wu, F. Liu, H. S. Yin, N. Lu and S. Y. Ai, *Microchim Acta*, 2019, 186, 488.
3. E. Povedano, A. Valverde, V. R. Montiel, M. Pedrero, P. Yanez-Sedeno, R. Barderas, P. San Segundo-Acosta, A. Pelaez-Garcia, M. Mendiola, D. Hardisson, S. Campuzano and J. M. Pingarron, *Angew Chem Int Ed Engl*, 2018, 57, 8194-8198.
4. S. A. Hong, Y. J. Kim, S. J. Kim and S. Yang, *Biosens Bioelectron*, 2018, 107, 103-110.
5. T. Dai, Q. L. Pu, Y. C. Guo, C. Zuo, S. L. Bai, Y. J. Yang, D. Yin, Y. Li, S. C. Sheng, Y. Y. Tao, J. Fang, W. Yu and G. M. Xie, *Biosens Bioelectron*, 2018, 114, 72-77.
6. H. S. Yin, Y. L. Zhou, Z. Q. Yang, Y. L. Guo, X. X. Wang, S. Y. Ai and X. S. Zhang, *Sensor Actuat B-Chem*, 2015, 221, 1-6.
7. X. Y. Ou, Q. L. Pu, S. C. Sheng, T. Dai, D. Gou, W. Yu, T. Y. Yang, L. Dai, Y. J. Yang and G. M. Xie, *Microchim Acta*, 2020, 187, 31.
8. Z. Li, B. C. Li, H. S. Yin, Q. H. Zhang, H. Y. Wang, H. Fan and S. Y. Ai, *J Electroanal Chem*, 2017, 804, 192-198.
